# Supplementary material for: COVID-19 Pandemic and Remote Education Contributes to Improved Nutritional Behaviors and Increased Screen Time in a Polish Population-Based Sample of Primary School Adolescents: Diet and Activity of Youth during COVID-19 (DAY-19) Study
Source: MDPI journal article supplement (doi:10.3390/nu13051596), 2021-05-11
Supplement: s1 [file s1]

# COVID-19 Pandemic and Remote Education Contributes Improved Nutritional Behaviours and Increased Screen Time in a Polish Population-Based Sample of Primary School Adolescents: Diet and Activity of Youth during COVID-19 (DAY-19) Study

Aleksandra Kołota \*, Dominika Głąbska

**Table S1.** Analysis of declared fruit consumption in the studied group of Polish adolescents stratified by gender, age, size of the city and COVID-19 morbidity in voivodeship.

| Category                                      | Portions per day | Before COVID-19 | During remote education due to COVID-19 | p-Value |
|-----------------------------------------------|------------------|-----------------|-----------------------------------------|---------|
| Gender                                        |                  |                 |                                         |         |
| Girls<br>( <i>n</i> = 711)                    | 0-1              | 29 (4.1%)       | 30 (4.2%)                               | <0.0001 |
|                                               | 2                | 274 (38.5%)     | 188 (26.5%)                             |         |
|                                               | ≥3               | 408 (57.4%)     | 493 (69.3%)                             |         |
| Boys<br>( <i>n</i> = 623)                     | 0-1              | 38 (6.1%)       | 39 (6.3%)                               | 0.2354  |
|                                               | 2                | 257 (41.2%)     | 228 (36.6%)                             |         |
|                                               | ≥3               | 328 (52.7%)     | 356 (57.1%)                             |         |
| Age (years)                                   |                  |                 |                                         |         |
| 10-13<br>( <i>n</i> = 1017)                   | 0-1              | 447 (43.9%)     | 388 (38.1%)                             | 0.0001  |
|                                               | 2                | 375 (36.9%)     | 352 (34.6%)                             |         |
|                                               | ≥3               | 195 (19.2%)     | 277 (27.2%)                             |         |
| 13-16<br>( <i>n</i> = 317)                    | 0-1              | 150 (47.3%)     | 97 (30.6%)                              | <0.0001 |
|                                               | 2                | 109 (34.4%)     | 131 (41.3%)                             |         |
|                                               | ≥3               | 58 (18.3%)      | 89 (28.1%)                              |         |
| Size of the city                              |                  |                 |                                         |         |
| Urban<br>( <i>n</i> = 968)                    | 0-1              | 445 (45.9%)     | 371 (38.3%)                             | <0.0001 |
|                                               | 2                | 353 (36.5%)     | 343 (35.4%)                             |         |
|                                               | ≥3               | 170 (17.6%)     | 254 (26.3%)                             |         |
| Rural<br>( <i>n</i> = 366)                    | 0-1              | 152 (41.5%)     | 114 (31.1%)                             | <0.0001 |
|                                               | 2                | 131 (35.8%)     | 112 (30.6%)                             |         |
|                                               | ≥3               | 83 (22.7%)      | 140 (38.3%)                             |         |
| COVID-19 morbidity for the voivodeship        |                  |                 |                                         |         |
| Morbidity < 40/ 100.000<br>( <i>n</i> = 413)  | 0-1              | 196 (47.2%)     | 143 (34.6%)                             | 0.0004  |
|                                               | 2                | 140 (33.9%)     | 160 (38.8%)                             |         |
|                                               | ≥3               | 77 (18.6%)      | 110 (14.5%)                             |         |
| Morbidity 40-80/ 100.000<br>( <i>n</i> = 537) | 0-1              | 241 (44.9%)     | 225 (41.9%)                             | 0.0099  |
|                                               | 2                | 196 (36.5%)     | 171 (31.8%)                             |         |
|                                               | ≥3               | 100 (18.6%)     | 141 (26.3%)                             |         |
| Morbidity 80-160/ 100.000                     | 0-1              | 85 (40.7%)      | 60 (28.7%)                              | 0.0056  |

|                                      |     |             |             |         |
|--------------------------------------|-----|-------------|-------------|---------|
| (n = 209)                            | 2   | 77 (36.8%)  | 75 (35.9%)  | 0.0928  |
|                                      | ≥3  | 47 (22.5%)  | 74 (35.4%)  |         |
|                                      | 0-1 | 75 (42.8%)  | 57 (32.6%)  |         |
| Morbidity >160/ 100.000<br>(n = 175) | 2   | 71 (40.6%)  | 77 (44.0%)  | <0.0001 |
|                                      | ≥3  | 29 (16.6%)  | 41 (23.4%)  |         |
|                                      | 0-1 | 597 (44.7%) | 485 (36.4%) |         |
| Total<br>(n = 1334)                  | 2   | 484 (36.3%) | 483 (36.2%) | <0.0001 |
|                                      | ≥3  | 253 (19.0%) | 366 (27.4%) |         |
|                                      | 0-1 | 597 (44.7%) | 485 (36.4%) |         |

**Table S2.** Analysis of declared vegetable consumption in the studied group of Polish adolescents stratified by gender, age, size of the city and COVID-19 morbidity in voivodeship.

| Category                               | Portions per day | Before COVID-19 | During remote education due to COVID-19 | p-Value |
|----------------------------------------|------------------|-----------------|-----------------------------------------|---------|
| Gender                                 |                  |                 |                                         |         |
| Girls<br>(n = 711)                     | 0-2              | 343 (48.2%)     | 278 (39.1%)                             | 0.0004  |
|                                        | 3                | 236 (33.2%)     | 249 (35.0%)                             |         |
|                                        | ≥4               | 132 (18.6%)     | 184 (25.9%)                             |         |
| Boys<br>(n = 623)                      | 0-2              | 312 (50.1%)     | 286 (45.9%)                             | 0.1152  |
|                                        | 3                | 183 (29.4%)     | 179 (28.7%)                             |         |
|                                        | ≥4               | 128 (20.5%)     | 158 (25.4%)                             |         |
| Age (years)                            |                  |                 |                                         |         |
| 10-13<br>(n = 1017)                    | 0-2              | 821 (80.7%)     | 744 (75.1%)                             | 0.0044  |
|                                        | 3                | 113 (11.1%)     | 145 (14.3%)                             |         |
|                                        | ≥4               | 83 (8.2%)       | 108 (10.6%)                             |         |
| 13-16<br>(n = 317)                     | 0-2              | 253 (79.8%)     | 228 (71.9%)                             | 0.0077  |
|                                        | 3                | 46 (14.5%)      | 49 (15.5%)                              |         |
|                                        | ≥4               | 18 (5.7%)       | 40 (12.6%)                              |         |
| Size of the city                       |                  |                 |                                         |         |
| Urban<br>(n = 968)                     | 0-2              | 784 (81.0%)     | 715 (73.9%)                             | 0.0007  |
|                                        | 3                | 115 (11.9%)     | 150 (15.5%)                             |         |
|                                        | ≥4               | 69 (7.1%)       | 103 (10.6%)                             |         |
| Rural<br>(n = 366)                     | 0-2              | 290 (79.2%)     | 277 (75.7%)                             | 0.2875  |
|                                        | 3                | 44 (12.0%)      | 44 (12.0%)                              |         |
|                                        | ≥4               | 32 (8.8%)       | 45 (12.3%)                              |         |
| COVID-19 morbidity for the voivodeship |                  |                 |                                         |         |
| Morbidity < 40/ 100.000<br>(n = 413)   | 0-2              | 345 (83.5%)     | 312 (75.6%)                             | 0.0173  |
|                                        | 3                | 43 (10.4%)      | 63 (15.2%)                              |         |
|                                        | ≥4               | 25 (6.1%)       | 38 (9.2%)                               |         |
| Morbidity 40-80/ 100.000<br>(n = 537)  | 0-2              | 434 (80.7%)     | 412 (76.8%)                             | 0.2113  |
|                                        | 3                | 57 (10.6%)      | 62 (11.5%)                              |         |
|                                        | ≥4               | 47 (8.7%)       | 63 (11.7%)                              |         |
| Morbidity 80-160/ 100.000<br>(n = 209) | 0-2              | 150 (71.8%)     | 132 (63.2%)                             | 0.0739  |
|                                        | 3                | 38 (18.2%)      | 41 (19.6%)                              |         |
|                                        | ≥4               | 21 (10.0%)      | 36 (17.2%)                              |         |
| Morbidity >160/ 100.000<br>(n = 175)   | 0-2              | 146 (83.4%)     | 136 (77.7%)                             | 0.4009  |
|                                        | 3                | 21 (12.0%)      | 28 (16.0%)                              |         |

|            |  |     |             |             |        |
|------------|--|-----|-------------|-------------|--------|
|            |  | ≥4  | 8 (4.6%)    | 11 (6.3%)   |        |
|            |  | 0-2 | 146 (83.4%) | 136 (77.7%) |        |
|            |  | 3   | 21 (12.0%)  | 28 (16.0%)  | 0.0004 |
|            |  | ≥4  | 8 (4.6%)    | 11 (6.3%)   |        |
| Total      |  |     |             |             |        |
| (n = 1334) |  |     |             |             |        |

**Table S3.** Analysis of declared soft drinks consumption in the studied group of Polish adolescents stratified by gender, age, size of the city and COVID-19 morbidity in voivodeship.

| Category                               | Portions | Before COVID-19 | During re-<br>mote educa-<br>tion due to<br>COVID-19 | p-Value |
|----------------------------------------|----------|-----------------|------------------------------------------------------|---------|
| Gender                                 |          |                 |                                                      |         |
| Girls<br>(n = 711)                     | ≥1/week  | 446 (62.7%)     | 449 (63.1%)                                          | 0.8367  |
|                                        | 2-6/week | 199 (28.0%)     | 191 (26.9%)                                          |         |
|                                        | ≥1/day   | 66 (9.3%)       | 71 (10.0%)                                           |         |
| Boys<br>(n = 623)                      | ≥1/week  | 346 (55.6%)     | 346 (55.6%)                                          | 0.9616  |
|                                        | 2-6/week | 197 (31.6%)     | 194 (31.1%)                                          |         |
|                                        | ≥1/day   | 80 (12.8%)      | 83 (13.3%)                                           |         |
| Age (years)                            |          |                 |                                                      |         |
| 10-13<br>(n = 1017)                    | ≥1/week  | 629 (61.9%)     | 617 (60.7%)                                          | 0.7610  |
|                                        | 2-6/week | 295 (29.0%)     | 298 (29.3%)                                          |         |
|                                        | ≥1/day   | 93 (9.1%)       | 102 (10.0%)                                          |         |
| 13-16<br>(n = 317)                     | ≥1/week  | 163 (51.4%)     | 178 (56.2%)                                          | 0.4249  |
|                                        | 2-6/week | 101 (31.9%)     | 87 (27.4%)                                           |         |
|                                        | ≥1/day   | 53 (16.7%)      | 52 (16.4%)                                           |         |
| Size of the city                       |          |                 |                                                      |         |
| Urban<br>(n = 968)                     | ≥1/week  | 570 (58.9%)     | 581 (60.0%)                                          | 0.5117  |
|                                        | 2-6/week | 293 (30.3%)     | 272 (28.1%)                                          |         |
|                                        | ≥1/day   | 105 (10.8%)     | 115 (11.9%)                                          |         |
| Rural<br>(n = 366)                     | ≥1/week  | 222 (60.4%)     | 214 (58.5%)                                          | 0.719   |
|                                        | 2-6/week | 103 (28.1%)     | 113 (30.9%)                                          |         |
|                                        | ≥1/day   | 41 (11.2%)      | 39 (10.6%)                                           |         |
| COVID-19 morbidity for the voivodeship |          |                 |                                                      |         |
| Morbidity < 40/ 100.000<br>(n = 413)   | ≥1/week  | 248 (60.0%)     | 247 (59.8%)                                          | 0.9091  |
|                                        | 2-6/week | 113 (27.3%)     | 110 (26.6%)                                          |         |
|                                        | ≥1/day   | 52 (13.6%)      | 56 (13.6%)                                           |         |
| Morbidity 40-80/ 100.000<br>(n = 537)  | ≥1/week  | 305 (56.8%)     | 311 (57.9%)                                          | 0.8296  |
|                                        | 2-6/week | 181 (33.7%)     | 172 (32.0%)                                          |         |
|                                        | ≥1/day   | 51 (9.5%)       | 54 (10.1%)                                           |         |
| Morbidity 80-160/ 100.000<br>(n = 209) | ≥1/week  | 121 (57.9%)     | 122 (58.4%)                                          | 0.9938  |
|                                        | 2-6/week | 60 (28.7%)      | 59 (28.2%)                                           |         |
|                                        | ≥1/day   | 28 (13.4%)      | 28 (13.4%)                                           |         |
| Morbidity >160/ 100.000<br>(n = 175)   | ≥1/week  | 118 (67.4%)     | 115 (65.7%)                                          | 0.9430  |
|                                        | 2-6/week | 42 (24.0%)      | 44 (25.2%)                                           |         |
|                                        | ≥1/day   | 15 (8.6%)       | 16 (9.1%)                                            |         |
| Total<br>(n = 1334)                    | ≥1/week  | 792 (59.4%)     | 795 (59.6%)                                          | 0.8275  |
|                                        | 2-6/week | 396 (29.7%)     | 385 (28.9%)                                          |         |
|                                        | ≥1/day   | 146 (10.9%)     | 154 (11.5%)                                          |         |

**Table S4.** Analysis of declared water consumption in the studied group of Polish adolescents stratified by gender, age, size of the city and COVID-19 morbidity in voivodeship.

| Category                                       | Portions per day | Before COVID-19 | During re-<br>mote educa-<br>tion due to<br>COVID-19 | p-Value |
|------------------------------------------------|------------------|-----------------|------------------------------------------------------|---------|
| Gender                                         |                  |                 |                                                      |         |
| Girls<br>( <i>n</i> = 711)                     | <1               | 91 (12.8%)      | 74 (10.4%)                                           | 0.1039  |
|                                                | 1-2              | 218 (30.7%)     | 197 (27.7%)                                          |         |
|                                                | ≥3               | 402 (56.5%)     | 440 (61.9%)                                          |         |
| Boys<br>( <i>n</i> = 623)                      | <1               | 57 (9.1%)       | 63 (10.1%)                                           | 0.4321  |
|                                                | 1-2              | 188 (30.2%)     | 168 (27.0%)                                          |         |
|                                                | ≥3               | 378 (60.6%)     | 392 (62.9%)                                          |         |
| Age (years)                                    |                  |                 |                                                      |         |
| 10-13<br>( <i>n</i> = 1017)                    | <1               | 107 (10.5%)     | 101 (9.9%)                                           | 0.4182  |
|                                                | 1-2              | 310 (30.5%)     | 287 (28.2%)                                          |         |
|                                                | ≥3               | 600 (59.0%)     | 629 (61.9%)                                          |         |
| 13-16<br>( <i>n</i> = 317)                     | <1               | 41 (12.9%)      | 36 (11.4%)                                           | 0.1680  |
|                                                | 1-2              | 96 (30.3%)      | 78 (24.6%)                                           |         |
|                                                | ≥3               | 180 (56.8%)     | 203 (64.0%)                                          |         |
| Size of the city                               |                  |                 |                                                      |         |
| Urban<br>( <i>n</i> = 968)                     | <1               | 105 (10.9%)     | 106 (11.0%)                                          | 0.2792  |
|                                                | 1-2              | 284 (29.3%)     | 253 (26.1%)                                          |         |
|                                                | ≥3               | 579 (59.8%)     | 609 (62.9%)                                          |         |
| Rural<br>( <i>n</i> = 366)                     | <1               | 43 (11.7%)      | 31 (8.5%)                                            | 0.2765  |
|                                                | 1-2              | 112 (30.6%)     | 112 (30.6%)                                          |         |
|                                                | ≥3               | 211 (57.7%)     | 223 (60.9%)                                          |         |
| COVID-19 morbidity for the voivodeship         |                  |                 |                                                      |         |
| Morbidity < 40/ 100.000<br>( <i>n</i> = 413)   | <1               | 46 (11.1%)      | 37 (8.9%)                                            | 0.0199  |
|                                                | 1-2              | 197 (47.7%)     | 166 (40.3%)                                          |         |
|                                                | ≥3               | 170 (41.2%)     | 210 (50.8%)                                          |         |
| Morbidity 40-80/ 100.000<br>( <i>n</i> = 537)  | <1               | 71 (13.2%)      | 73 (13.6%)                                           | 0.2549  |
|                                                | 1-2              | 236 (43.9%)     | 210 (39.1%)                                          |         |
|                                                | ≥3               | 230 (42.9%)     | 254 (47.3%)                                          |         |
| Morbidity 80-160/ 100.000<br>( <i>n</i> = 209) | <1               | 15 (7.2%)       | 13 (6.2%)                                            | 0.1759  |
|                                                | 1-2              | 106 (50.7%)     | 89 (42.6%)                                           |         |
|                                                | ≥3               | 88 (42.1%)      | 107 (51.2%)                                          |         |
| Morbidity >160/ 100.000<br>( <i>n</i> = 175)   | <1               | 16 (9.1%)       | 14 (8.0%)                                            | 0.7247  |
|                                                | 1-2              | 98 (56.0%)      | 93 (53.1%)                                           |         |
|                                                | ≥3               | 61 (34.9%)      | 68 (38.9%)                                           |         |
| Total<br>( <i>n</i> = 1334)                    | <1               | 148 (11.1%)     | 137 (10.3%)                                          | 0.0020  |
|                                                | 1-2              | 637 (47.8%)     | 558 (41.8%)                                          |         |
|                                                | ≥3               | 549 (41.1%)     | 639 (47.9%)                                          |         |

**Table S5.** Analysis of declared French fried potatoes consumption in the studied group of Polish adolescents stratified by gender, age, size of the city and COVID-19 morbidity in voivodeship.

| Category                               | Portions per week | Before COVID-19 | During remote education due to COVID-19 | p-Value |
|----------------------------------------|-------------------|-----------------|-----------------------------------------|---------|
| Gender                                 |                   |                 |                                         |         |
| Girls<br>(n = 711)                     | <1                | 576 (81.0%)     | 571 (80.3%)                             | 0.5822  |
|                                        | 1-2               | 115 (16.2%)     | 113 (15.9%)                             |         |
|                                        | ≥2                | 20 (2.8%)       | 27 (3.8%)                               |         |
| Boys<br>(n = 623)                      | <1                | 503 (80.7%)     | 483 (77.5%)                             | 0.3778  |
|                                        | 1-2               | 98 (15.7%)      | 114 (18.3%)                             |         |
|                                        | ≥2                | 22 (3.6%)       | 26 (4.2%)                               |         |
| Age (years)                            |                   |                 |                                         |         |
| 10-13<br>(n = 1017)                    | <1                | 830 (81.6%)     | 809 (79.6%)                             | 0.4164  |
|                                        | 1-2               | 158 (15.5%)     | 171 (16.8%)                             |         |
|                                        | ≥2                | 29 (2.9%)       | 37 (3.6%)                               |         |
| 13-16<br>(n = 317)                     | <1                | 249 (78.6%)     | 245 (77.4%)                             | 0.8999  |
|                                        | 1-2               | 55 (17.3%)      | 57 (17.9%)                              |         |
|                                        | ≥2                | 13 (4.1%)       | 15 (4.7%)                               |         |
| Size of the city                       |                   |                 |                                         |         |
| Urban<br>(n = 968)                     | <1                | 783 (80.9%)     | 766 (79.2%)                             | 0.3957  |
|                                        | 1-2               | 157 (16.2%)     | 164 (16.9%)                             |         |
|                                        | ≥2                | 28 (2.9%)       | 38 (3.9%)                               |         |
| Rural<br>(n = 366)                     | <1                | 296 (80.8%)     | 288 (78.7%)                             | 0.7574  |
|                                        | 1-2               | 56 (15.3%)      | 63 (17.2%)                              |         |
|                                        | ≥2                | 14 (3.8%)       | 15 (4.1%)                               |         |
| COVID-19 morbidity for the voivodeship |                   |                 |                                         |         |
| Morbidity < 40/ 100.000<br>(n = 413)   | <1                | 328 (79.4%)     | 323 (78.2%)                             | 0.8989  |
|                                        | 1-2               | 69 (16.7%)      | 74 (17.9%)                              |         |
|                                        | ≥2                | 16 (3.9%)       | 16 (3.9%)                               |         |
| Morbidity 40-80/ 100.000<br>(n = 537)  | <1                | 423 (78.7%)     | 415 (77.3%)                             | 0.3318  |
|                                        | 1-2               | 96 (17.8%)      | 93 (17.3%)                              |         |
|                                        | ≥2                | 19 (3.5%)       | 29 (5.4%)                               |         |
| Morbidity 80-160/ 100.000<br>(n = 209) | <1                | 173 (82.8%)     | 164 (78.5%)                             | 0.4931  |
|                                        | 1-2               | 30 (14.3%)      | 39 (18.6%)                              |         |
|                                        | ≥2                | 6 (2.9%)        | 6 (2.9%)                                |         |
| Morbidity >160/ 100.000<br>(n = 175)   | <1                | 155 (88.6%)     | 152 (86.9%)                             | 0.8781  |
|                                        | 1-2               | 18 (10.3%)      | 21 (12.0%)                              |         |
|                                        | ≥2                | 2 (1.1%)        | 2 (1.1%)                                |         |
| Total<br>(n = 1334)                    | <1                | 1079 (80.9%)    | 1054 (79.0%)                            | 0.3657  |
|                                        | 1-2               | 213 (15.9%)     | 227 (17.0%)                             |         |
|                                        | ≥2                | 42 (3.2%)       | 53 (4.0%)                               |         |

**Table S6.** Analysis of declared fast food consumption in the studied group of Polish adolescents stratified by gender, age, size of the city and COVID-19 morbidity in voivodeship.

| Category                               | Portions per week | Before COVID-19 | During re-<br>mote educa-<br>tion due to<br>COVID-19 | p-Value |
|----------------------------------------|-------------------|-----------------|------------------------------------------------------|---------|
| Gender                                 |                   |                 |                                                      |         |
| Girls<br>(n = 711)                     | <1                | 644 (90.6%)     | 637 (89.6%)                                          | 0.3381  |
|                                        | 1-2               | 59 (8.3%)       | 59 (8.3%)                                            |         |
|                                        | ≥2                | 8 (1.1%)        | 15 (2.1%)                                            |         |
| Boys<br>(n = 623)                      | <1                | 553 (88.8%)     | 550 (88.3%)                                          | 0.7835  |
|                                        | 1-2               | 55 (8.8%)       | 54 (8.7%)                                            |         |
|                                        | ≥2                | 15 (2.4%)       | 19 (3.0%)                                            |         |
| Age (years)                            |                   |                 |                                                      |         |
| 10-13<br>(n = 1017)                    | <1                | 929 (91.3%)     | 913 (89.8%)                                          | 0.2972  |
|                                        | 1-2               | 75 (7.4%)       | 83 (8.2%)                                            |         |
|                                        | ≥2                | 13 (1.3%)       | 21 (2.0%)                                            |         |
| 13-16<br>(n = 317)                     | <1                | 268 (84.5%)     | 274 (86.4%)                                          | 0.4423  |
|                                        | 1-2               | 39 (12.3%)      | 30 (9.5%)                                            |         |
|                                        | ≥2                | 10 (3.2%)       | 13 (4.1%)                                            |         |
| Size of the city                       |                   |                 |                                                      |         |
| Urban<br>(n = 968)                     | <1                | 862 (89.0%)     | 850 (87.8%)                                          | 0.3647  |
|                                        | 1-2               | 89 (9.2%)       | 92 (9.5%)                                            |         |
|                                        | ≥2                | 17 (1.8%)       | 26 (2.7%)                                            |         |
| Rural<br>(n = 366)                     | <1                | 335 (91.5%)     | 337 (92.1%)                                          | 0.7263  |
|                                        | 1-2               | 25 (6.9%)       | 21 (5.7%)                                            |         |
|                                        | ≥2                | 6 (1.6%)        | 8 (2.2%)                                             |         |
| COVID-19 morbidity for the voivodeship |                   |                 |                                                      |         |
| Morbidity < 40/ 100.000<br>(n = 413)   | <1                | 362 (87.7%)     | 362 (87.7%)                                          | 0.5527  |
|                                        | 1-2               | 45 (10.9%)      | 41 (9.9%)                                            |         |
|                                        | ≥2                | 6 (1.4%)        | 10 (2.4%)                                            |         |
| Morbidity 40-80/ 100.000<br>(n = 537)  | <1                | 473 (88.1%)     | 470 (87.5%)                                          | 0.7585  |
|                                        | 1-2               | 51 (9.5%)       | 50 (9.3%)                                            |         |
|                                        | ≥2                | 13 (2.4%)       | 17 (3.2%)                                            |         |
| Morbidity 80-160/ 100.000<br>(n = 209) | <1                | 196 (93.8%)     | 193 (92.4%)                                          | 0.6931  |
|                                        | 1-2               | 11 (5.3%)       | 12 (5.7%)                                            |         |
|                                        | ≥2                | 2 (0.9%)        | 4 (1.9%)                                             |         |
| Morbidity >160/ 100.000<br>(n = 175)   | <1                | 166 (94.5%)     | 162 (92.6%)                                          | 0.5919  |
|                                        | 1-2               | 6 (3.4%)        | 10 (5.7%)                                            |         |
|                                        | ≥2                | 3 (1.7%)        | 3 (1.7%)                                             |         |
| Total<br>(n = 1334)                    | <1                | 1197 (89.7%)    | 1187 (88.9%)                                         | 0.4135  |
|                                        | 1-2               | 113 (8.5%)      | 113 (8.5%)                                           |         |
|                                        | ≥2                | 24 (1.8%)       | 34 (2.6%)                                            |         |

**Table S7.** Analysis of declared frequency of eating their meals in front of the television in the studied group of Polish adolescents stratified by gender, age, size of the city and COVID-19 morbidity in voivodeship.

| Category                               | Frequency       | Before COVID-19 | During re-<br>mote edu-<br>cation due<br>to COVID-<br>19 | p-Value |
|----------------------------------------|-----------------|-----------------|----------------------------------------------------------|---------|
| Gender                                 |                 |                 |                                                          |         |
| Girls<br>(n = 711)                     | Never or rarely | 271 (38.1%)     | 226 (31.8%)                                              | 0.0001  |
|                                        | 1-2             | 146 (20.5%)     | 220 (30.9%)                                              |         |
|                                        | ≥3              | 204 (28.7%)     | 184 (25.9%)                                              |         |
|                                        | 7/week          | 90 (12.7%)      | 81 (11.4%)                                               |         |
| Boys<br>(n = 623)                      | Never or rarely | 205 (32.9%)     | 159 (25.6%)                                              | <0.0001 |
|                                        | 1-2             | 104 (16.7%)     | 182 (29.2%)                                              |         |
|                                        | ≥3              | 211 (33.9%)     | 192 (30.8%)                                              |         |
|                                        | 7/week          | 103 (16.5%)     | 90 (14.4%)                                               |         |
| Age (years)                            |                 |                 |                                                          |         |
| 10-13<br>(n = 1017)                    | Never or rarely | 383 (37.7%)     | 308 (30.3%)                                              | <0.0001 |
|                                        | 1-2             | 192 (18.9%)     | 319 (31.4%)                                              |         |
|                                        | ≥3              | 303 (29.8%)     | 271 (26.6%)                                              |         |
|                                        | 7/week          | 139 (13.6%)     | 119 (11.7%)                                              |         |
| 13-16<br>(n = 317)                     | Never or rarely | 93 (29.3%)      | 77 (24.3%)                                               | 0.1022  |
|                                        | 1-2             | 58 (18.3%)      | 83 (26.2%)                                               |         |
|                                        | ≥3              | 112 (35.3%)     | 105 (33.1%)                                              |         |
|                                        | 7/week          | 54 (17.1%)      | 52 (16.4%)                                               |         |
| Size of the city                       |                 |                 |                                                          |         |
| Urban<br>(n = 968)                     | Never or rarely | 335 (34.6%)     | 269 (27.8%)                                              | <0.0001 |
|                                        | 1-2             | 172 (17.8%)     | 287 (29.7%)                                              |         |
|                                        | ≥3              | 310 (32.0%)     | 280 (28.9%)                                              |         |
|                                        | 7/week          | 151 (15.6%)     | 132 (13.6%)                                              |         |
| Rural<br>(n = 366)                     | Never or rarely | 141 (38.5%)     | 116 (31.7%)                                              | 0.0182  |
|                                        | 1-2             | 78 (21.3%)      | 115 (31.4%)                                              |         |
|                                        | ≥3              | 105 (28.7%)     | 96 (26.2%)                                               |         |
|                                        | 7/week          | 42 (11.5%)      | 39 (10.7%)                                               |         |
| COVID-19 morbidity for the voivodeship |                 |                 |                                                          |         |
| Morbidity < 40/ 100.000<br>(n = 413)   | Never or rarely | 143 (34.6%)     | 127 (30.7%)                                              | 0.2042  |
|                                        | 1-2             | 170 (41.2%)     | 199 (48.2%)                                              |         |
|                                        | ≥3              | 44 (10.6%)      | 34 (8.2%)                                                |         |
|                                        | 7/week          | 56 (13.6%)      | 53 (12.8%)                                               |         |
| Morbidity 40-80/ 100.000<br>(n = 537)  | Never or rarely | 188 (35.0%)     | 151 (28.1%)                                              | 0.0107  |
|                                        | 1-2             | 207 (38.5%)     | 260 (48.4%)                                              |         |
|                                        | ≥3              | 56 (10.5%)      | 53 (9.9%)                                                |         |
|                                        | 7/week          | 86 (16.0%)      | 73 (13.6%)                                               |         |
| Morbidity 80-160/ 100.000<br>(n = 209) | Never or rarely | 88 (42.1%)      | 67 (32.1%)                                               | 0.0117  |
|                                        | 1-2             | 62 (29.7%)      | 94 (45.0%)                                               |         |
|                                        | ≥3              | 31 (14.8%)      | 22 (10.5%)                                               |         |
|                                        | 7/week          | 28 (13.4%)      | 26 (12.4%)                                               |         |
| Morbidity >160/ 100.000<br>(n = 175)   | Never or rarely | 56 (32.0%)      | 40 (22.8%)                                               | 0.0486  |
|                                        | 1-2             | 70 (40.0%)      | 96 (54.9%)                                               |         |

|            |                 |             |             |         |
|------------|-----------------|-------------|-------------|---------|
|            | ≥3              | 25 (14.3%)  | 20 (11.4%)  |         |
|            | 7/week          | 24 (13.7%)  | 19 (10.9%)  |         |
|            | Never or rarely | 475 (35.6%) | 385 (28.9%) |         |
| Total      | 1-2             | 509 (38.2%) | 649 (48.6%) |         |
| (n = 1334) | ≥3              | 156 (11.7%) | 129 (9.7%)  | <0.0001 |
|            | 7/week          | 194 (14.5%) | 171 (12.8%) |         |

**Table S8.** Analysis of declared number of days a week when they are physically active in the studied group of Polish adolescents stratified by gender, age, size of the city and COVID-19 morbidity in voivodeship.

| Category                               | Frequency<br>per week | Before<br>COVID-19 | During re-<br>mote educa-<br>tion due to<br>COVID-19 | p-Value |
|----------------------------------------|-----------------------|--------------------|------------------------------------------------------|---------|
| Gender                                 |                       |                    |                                                      |         |
| Girls<br>(n = 711)                     | 0-2/week              | 240 (33.8%)        | 273 (38.4%)                                          | 0.0772  |
|                                        | ≥ 3/week              | 471 (66.2%)        | 438 (61.6%)                                          |         |
| Boys<br>(n = 623)                      | 0-2/week              | 194 (31.1%)        | 246 (39.5%)                                          | 0.0025  |
|                                        | ≥ 3/week              | 429 (68.9%)        | 377 (60.5%)                                          |         |
| Age (years)                            |                       |                    |                                                      |         |
| 10-13<br>(n = 1017)                    | 0-2/week              | 400 (39.3%)        | 364 (35.8%)                                          | 0.1090  |
|                                        | ≥ 3/week              | 617 (60.7%)        | 653 (64.2%)                                          |         |
| 13-16<br>(n = 317)                     | 0-2/week              | 142 (44.8%)        | 137 (43.2%)                                          | 0.7489  |
|                                        | ≥ 3/week              | 175 (55.2%)        | 180 (56.8%)                                          |         |
| Size of the city                       |                       |                    |                                                      |         |
| Urban<br>(n = 968)                     | 0-2/week              | 401 (41.4%)        | 368 (38.0%)                                          | 0.1372  |
|                                        | ≥ 3/week              | 567 (58.6%)        | 600 (62.0%)                                          |         |
| Rural<br>(n = 366)                     | 0-2/week              | 141 (38.5%)        | 133 (50.0%)                                          | 0.0052  |
|                                        | ≥ 3/week              | 225 (61.5%)        | 133 (50.0%)                                          |         |
| COVID-19 morbidity for the voivodeship |                       |                    |                                                      |         |
| Morbidity < 40/ 100.000<br>(n = 413)   | 0-2/week              | 170 (41.2%)        | 150 (36.3%)                                          | 0.1748  |
|                                        | ≥ 3/week              | 243 (58.8%)        | 263 (63.7%)                                          |         |
| Morbidity 40-80/ 100.000<br>(n = 537)  | 0-2/week              | 221 (41.1%)        | 204 (37.9%)                                          | 0.3181  |
|                                        | ≥ 3/week              | 316 (58.9%)        | 333 (62.1%)                                          |         |
| Morbidity 80-160/ 100.000<br>(n = 209) | 0-2/week              | 83 (39.7%)         | 76 (36.4%)                                           | 0.5455  |
|                                        | ≥ 3/week              | 126 (60.3%)        | 133 (63.6%)                                          |         |
| Morbidity >160/ 100.000<br>(n = 175)   | 0-2/week              | 68 (38.9%)         | 71 (40.6%)                                           | 0.8271  |
|                                        | ≥ 3/week              | 107 (61.1%)        | 104 (59.4%)                                          |         |
| Total<br>(n = 1334)                    | 0-2/week              | 542 (40.6%)        | 501 (37.6%)                                          | 0.1125  |
|                                        | ≥ 3/week              | 792 (59.4%)        | 833 (62.4%)                                          |         |

**Table S9.** Analysis of declared number of hours a day that they usually spend watching television in the studied group of Polish adolescents stratified by gender, age, size of the city and COVID-19 morbidity in voivodeship.

| Category                               | Frequency<br>per day | Before<br>COVID-19 | During re-<br>mote educa-<br>tion due to<br>COVID-19 | p-Value |
|----------------------------------------|----------------------|--------------------|------------------------------------------------------|---------|
| Gender                                 |                      |                    |                                                      |         |
| Girls<br>(n = 711)                     | < 2 h/day            | 193 (27.1%)        | 106 (14.9%)                                          | <0.0001 |
|                                        | ≥ 2 h/day            | 518 (72.9%)        | 605 (85.1%)                                          |         |
| Boys<br>(n = 623)                      | < 2 h/day            | 85 (13.6%)         | 45 (7.2%)                                            | 0.0003  |
|                                        | ≥ 2 h/day            | 538 (86.4%)        | 578 (92.7%)                                          |         |
| Age (years)                            |                      |                    |                                                      |         |
| 10-13<br>(n = 1017)                    | < 2 h/day            | 222 (21.8%)        | 56 (17.7%)                                           | 0.1299  |
|                                        | ≥ 2 h/day            | 795 (78.2%)        | 261 (82.3%)                                          |         |
| 13-16<br>(n = 317)                     | < 2 h/day            | 115 (11.3%)        | 36 (11.4%)                                           | 1.0000  |
|                                        | ≥ 2 h/day            | 902 (88.7%)        | 281 (88.6%)                                          |         |
| Size of the city                       |                      |                    |                                                      |         |
| Urban<br>(n = 968)                     | < 2 h/day            | 455 (47.0%)        | 272 (28.1%)                                          | <0.0001 |
|                                        | ≥ 2 h/day            | 513 (53.0%)        | 696 (71.9%)                                          |         |
| Rural<br>(n = 366)                     | < 2 h/day            | 208 (56.8%)        | 138 (37.7%)                                          | <0.0001 |
|                                        | ≥ 2 h/day            | 158 (43.2%)        | 228 (62.3%)                                          |         |
| COVID-19 morbidity for the voivodeship |                      |                    |                                                      |         |
| Morbidity < 40/ 100.000<br>(n = 413)   | < 2 h/day            | 83 (20.1%)         | 40 (9.7%)                                            | <0.0001 |
|                                        | ≥ 2 h/day            | 330 (79.9%)        | 373 (90.3%)                                          |         |
| Morbidity 40-80/ 100.000<br>(n = 537)  | < 2 h/day            | 125 (23.2%)        | 70 (13.1%)                                           | <0.0001 |
|                                        | ≥ 2 h/day            | 109 (76.8%)        | 467 (86.9%)                                          |         |
| Morbidity 80-160/ 100.000<br>(n = 209) | < 2 h/day            | 57 (27.3%)         | 30 (14.3%)                                           | 0.0017  |
|                                        | ≥ 2 h/day            | 152 (72.7%)        | 179 (85.7%)                                          |         |
| Morbidity >160/ 100.000<br>(n = 175)   | < 2 h/day            | 24 (13.7%)         | 15 (8.6%)                                            | 0.1742  |
|                                        | ≥ 2 h/day            | 151 (86.3%)        | 160 (91.4%)                                          |         |
| Total<br>(n = 1334)                    | < 2 h/day            | 289 (21.7%)        | 155 (11.6%)                                          | <0.0001 |
|                                        | ≥ 2 h/day            | 1045 (78.3%)       | 1179 (88.4%)                                         |         |
